# Supplementary material for: A Statistical Porosity Characterization Approach of Carbon-Fiber-Reinforced Polymer Material Using Optical Microscopy and Neural Network
Source: MDPI journal article supplement (doi:10.3390/ma15196540), 2022-09-21
Supplement: s1 [file s1]

```

# Code Created Sept-2021
# Author: saraeli@kth.se
# -----
'''
Code developed by Sara Eliasson (saraeli@kth.se) - September 2021
Published in MDPI Materials (materials-1902929)
-----
Script for training a U-Net for phase characterization of CFRP micrographs.
'''
# -----
# IMPORTS
# -----
import tensorflow as tf
from tensorflow.keras.layers import Conv2D, BatchNormalization, Activation, MaxPool2D,
Conv2DTranspose, Concatenate, Input, CenterCrop
from tensorflow.keras.models import Model
from tensorflow.keras.preprocessing.image import ImageDataGenerator
from sklearn.model_selection import train_test_split
from tensorflow.keras.callbacks import ModelCheckpoint, ReduceLROnPlateau, EarlyStopping,
TensorBoard, CSVLogger
from tensorflow.keras.utils import to_categorical
from tensorflow import image
from tensorflow.image import resize_with_crop_or_pad
import os
import cv2
import matplotlib.pyplot as plt
import numpy as np
from PIL import Image
from random import shuffle
from tqdm import tqdm
from sklearn.utils import class_weight
from sklearn.preprocessing import LabelEncoder

# -----
## =====
#
# CLASSES
#
## =====
# The U-Net is written as a class using the TensorFlow subclassing Model class.
class CNN_UNet(Model):
    '''
    CNN - Convolutional Neural Network
    The structure of the CNN follows the U-Net architecture presented by Ronneberger 2015.
    '''

    # In TensorFlow, if subclassing Model class: you should define your
    # layers in __init__ and you should implement
    # the model's forward pass in call.

    def __init__(self, input_dim, num_layers, num_classes, batch_size):
        super(CNN_UNet, self).__init__()
        # Define the input variables as methods, for example
        self.input_dim = input_dim
        self.batch_size = batch_size
        self.num_layers = num_layers
        self.num_classes = num_classes

        # VARIABLES FOR THE U-Net:
        NUM_FILTER1 = 64
        NUM_FILTER2 = 128
        NUM_FILTER3 = 256
        NUM_FILTER4 = 512
        NUM_FILTER5 = 1024

        KERNEL_SIZE = 3

        # No padding is used for the U-Net.
        PADDING = 'valid' # 'valid' = No padding
        # 'same' = Padding with zeros

        # Define the convolutional neural network composing elements/layers
        # (check the documentation for the required inputs)
        # The U-Net (Ronneberger 2015), has a contracting path
        # (encoders) and an expansive path (decoders).

```

```

# ENCODER 1
self.encoder1_1_Conv = Conv2D(NUM_FILTER1, KERNEL_SIZE, padding=PADDING)
self.encoder1_1_BatchNorm = BatchNormalization()
self.encoder1_1_Activation = Activation('relu')
self.encoder1_2_Conv = Conv2D(NUM_FILTER1, KERNEL_SIZE, padding=PADDING)
self.encoder1_2_BatchNorm = BatchNormalization()
self.encoder1_2_Activation = Activation('relu')
self.encoder1_2_Pooling = MaxPool2D(pool_size=(2,2))
self.encoder1_crop4concatenation = CenterCrop(392,392)

# ENCODER 2
self.encoder2_1_Conv = Conv2D(NUM_FILTER2, KERNEL_SIZE, padding=PADDING)
self.encoder2_1_BatchNorm = BatchNormalization()
self.encoder2_1_Activation = Activation('relu')
self.encoder2_2_Conv = Conv2D(NUM_FILTER2, KERNEL_SIZE, padding=PADDING)
self.encoder2_2_BatchNorm = BatchNormalization()
self.encoder2_2_Activation = Activation('relu')
self.encoder2_2_Pooling = MaxPool2D(pool_size=(2, 2))
self.encoder2_crop4concatenation = CenterCrop(200,200)

# ENCODER 3
self.encoder3_1_Conv = Conv2D(NUM_FILTER3, KERNEL_SIZE, padding=PADDING)
self.encoder3_1_BatchNorm = BatchNormalization()
self.encoder3_1_Activation = Activation('relu')
self.encoder3_2_Conv = Conv2D(NUM_FILTER3, KERNEL_SIZE, padding=PADDING)
self.encoder3_2_BatchNorm = BatchNormalization()
self.encoder3_2_Activation = Activation('relu')
self.encoder3_2_Pooling = MaxPool2D(pool_size=(2, 2))
self.encoder3_crop4concatenation = CenterCrop(104,104)

# ENCODER 4
self.encoder4_1_Conv = Conv2D(NUM_FILTER4, KERNEL_SIZE, padding=PADDING)
self.encoder4_1_BatchNorm = BatchNormalization()
self.encoder4_1_Activation = Activation('relu')
self.encoder4_2_Conv = Conv2D(NUM_FILTER4, KERNEL_SIZE, padding=PADDING)
self.encoder4_2_BatchNorm = BatchNormalization()
self.encoder4_2_Activation = Activation('relu')
self.encoder4_2_Pooling = MaxPool2D(pool_size=(2, 2))
self.encoder4_crop4concatenation = CenterCrop(56,56)

# BRIDGE
self.bridge_1_Conv = Conv2D(NUM_FILTER5, KERNEL_SIZE, padding=PADDING)
self.bridge_1_BatchNorm = BatchNormalization()
self.bridge_1_Activation = Activation('relu')
self.bridge_2_Conv = Conv2D(NUM_FILTER5, KERNEL_SIZE, padding=PADDING)
self.bridge_2_BatchNorm = BatchNormalization()
self.bridge_2_Activation = Activation('relu')

# DECODER 1
self.decoder1_1_ConvTrans = Conv2DTranspose(NUM_FILTER4, (2,2), strides=2,
padding=PADDING)
self.decoder1_1_Concatenate = Concatenate() # Retaining spatial information (features
from encoder added to decoder)
self.decoder1_2_Conv = Conv2D(NUM_FILTER4, KERNEL_SIZE, padding=PADDING)
self.decoder1_2_BatchNorm = BatchNormalization()
self.decoder1_2_Activation = Activation('relu')
self.decoder1_3_Conv = Conv2D(NUM_FILTER4, KERNEL_SIZE, padding=PADDING)
self.decoder1_3_BatchNorm = BatchNormalization()
self.decoder1_3_Activation = Activation('relu')

# DECODER 2
self.decoder2_1_ConvTrans = Conv2DTranspose(NUM_FILTER3, (2, 2), strides=2,
padding=PADDING)
self.decoder2_1_Concatenate = Concatenate()
self.decoder2_2_Conv = Conv2D(NUM_FILTER3, KERNEL_SIZE, padding=PADDING)
self.decoder2_2_BatchNorm = BatchNormalization()
self.decoder2_2_Activation = Activation('relu')
self.decoder2_3_Conv = Conv2D(NUM_FILTER3, KERNEL_SIZE, padding=PADDING)
self.decoder2_3_BatchNorm = BatchNormalization()
self.decoder2_3_Activation = Activation('relu')

# DECODER 3
self.decoder3_1_ConvTrans = Conv2DTranspose(NUM_FILTER2, (2, 2), strides=2,
padding=PADDING)
self.decoder3_1_Concatenate = Concatenate()
self.decoder3_2_Conv = Conv2D(NUM_FILTER2, KERNEL_SIZE, padding=PADDING)
self.decoder3_2_BatchNorm = BatchNormalization()

```

```

self.decoder3_2_Activation = Activation('relu')
self.decoder3_3_Conv = Conv2D(NUM_FILTER2, KERNEL_SIZE, padding=PADDING)
self.decoder3_3_BatchNorm = BatchNormalization()
self.decoder3_3_Activation = Activation('relu')

# DECODER 4
self.decoder4_1_ConvTrans = Conv2DTranspose(NUM_FILTER1, (2, 2), strides=2,
padding=PADDING)
self.decoder4_1_Concatenate = Concatenate()
self.decoder4_1_Conv = Conv2D(NUM_FILTER1, KERNEL_SIZE, padding=PADDING)
self.decoder4_2_BatchNorm = BatchNormalization()
self.decoder4_2_Activation = Activation('relu')
self.decoder4_3_Conv = Conv2D(NUM_FILTER1, KERNEL_SIZE, padding=PADDING)
self.decoder4_3_BatchNorm = BatchNormalization()
self.decoder4_3_Activation = Activation('relu')

# OUTPUT LAYER
# For this multiclass segmentation we use the number of classes as
# the output feature channel with softmax activation function.
self.final_output = Conv2D(num_classes, (1,1), padding=PADDING, activation='softmax')

# Define the forward pass
def call(self, x):
    # The input is fed to the recurrent layer
    # ENCODER 1
    x1 = self.encoder1_1_Conv(x)
    x1 = self.encoder1_1_BatchNorm(x1)
    x1 = self.encoder1_1_Activation(x1)
    x1 = self.encoder1_2_Conv(x1)
    x1 = self.encoder1_2_BatchNorm(x1)
    x1 = self.encoder1_2_Activation(x1)
    p1 = self.encoder1_2_Pooling(x1)
    x1 = self.encoder1_crop4concatenation(x1)    # This is done if PADDING = 'valid'

    # ENCODER 2
    x2 = self.encoder2_1_Conv(p1)
    x2 = self.encoder2_1_BatchNorm(x2)
    x2 = self.encoder2_1_Activation(x2)
    x2 = self.encoder2_2_Conv(x2)
    x2 = self.encoder2_2_BatchNorm(x2)
    x2 = self.encoder2_2_Activation(x2)
    p2 = self.encoder2_2_Pooling(x2)
    x2 = self.encoder2_crop4concatenation(x2)    # This is done if PADDING = 'valid'

    # ENCODER 3
    x3 = self.encoder3_1_Conv(p2)
    x3 = self.encoder3_1_BatchNorm(x3)
    x3 = self.encoder3_1_Activation(x3)
    x3 = self.encoder3_2_Conv(x3)
    x3 = self.encoder3_2_BatchNorm(x3)
    x3 = self.encoder3_2_Activation(x3)
    p3 = self.encoder3_2_Pooling(x3)
    x3 = self.encoder3_crop4concatenation(x3)    # This is done if PADDING = 'valid'

    # ENCODER 4
    x4 = self.encoder4_1_Conv(p3)
    x4 = self.encoder4_1_BatchNorm(x4)
    x4 = self.encoder4_1_Activation(x4)
    x4 = self.encoder4_2_Conv(x4)
    x4 = self.encoder4_2_BatchNorm(x4)
    x4 = self.encoder4_2_Activation(x4)
    p4 = self.encoder4_2_Pooling(x4)
    x4 = self.encoder4_crop4concatenation(x4)    # This is done if PADDING = 'valid'

    # BRIDGE
    x5 = self.bridge_1_Conv(p4)
    x5 = self.bridge_1_BatchNorm(x5)
    x5 = self.bridge_1_Activation(x5)
    x5 = self.bridge_2_Conv(x5)
    x5 = self.bridge_2_BatchNorm(x5)
    x5 = self.bridge_2_Activation(x5)

    # DECODER 1
    x6 = self.decoder1_1_ConvTrans(x5)
    x6 = self.decoder1_1_Concatenate([x6, x4])
    x6 = self.decoder1_2_Conv(x6)
    x6 = self.decoder1_2_BatchNorm(x6)

```

```

x6 = self.decoder1_2_Activation(x6)
x6 = self.decoder1_3_Conv(x6)
x6 = self.decoder1_3_BatchNorm(x6)
x6 = self.decoder1_3_Activation(x6)

# DECODER 2
x7 = self.decoder2_1_ConvTrans(x6)
x7 = self.decoder2_1_Concatenate([x7, x3])
x7 = self.decoder2_2_Conv(x7)
x7 = self.decoder2_2_BatchNorm(x7)
x7 = self.decoder2_2_Activation(x7)
x7 = self.decoder2_3_Conv(x7)
x7 = self.decoder2_3_BatchNorm(x7)
x7 = self.decoder2_3_Activation(x7)

# DECODER 3
x8 = self.decoder3_1_ConvTrans(x7)
x8 = self.decoder3_1_Concatenate([x8, x2])
x8 = self.decoder3_2_Conv(x8)
x8 = self.decoder3_2_BatchNorm(x8)
x8 = self.decoder3_2_Activation(x8)
x8 = self.decoder3_3_Conv(x8)
x8 = self.decoder3_3_BatchNorm(x8)
x8 = self.decoder3_3_Activation(x8)

# DECODER 4
x9 = self.decoder4_1_ConvTrans(x8)
x9 = self.decoder4_1_Concatenate([x9, x1])
x9 = self.decoder4_1_Conv(x9)
x9 = self.decoder4_2_BatchNorm(x9)
x9 = self.decoder4_2_Activation(x9)
x9 = self.decoder4_3_Conv(x9)
x9 = self.decoder4_3_BatchNorm(x9)
x9 = self.decoder4_3_Activation(x9)

# OUTPUT LAYER
finalOutput = self.final_output(x9)

return finalOutput

## =====
#
#                               MAIN FUNCTION
#
## =====
def main():
    '''
    The main function controls the training of the U-Net.
    The U-Net is implemented in TensorFlow and used to extract different phases
    from CFRP micrographs.
    -----
    There are five steps in the implementation:
    1. Define the model.
    2. Compile the model.
    3. Fit the model.
    4. Evaluate the model.
    5. Make predictions.
    -----
    Segmentation of CFRP
    3 Classes are characterized
    Pixel Value      -   Object      -   New Pixel Value
        1            -   Fiber       -       0
        2            -   Matrix      -       1
        3            -   Void        -       2
    '''
    # -----
    #                               LOAD DATA
    # -----
    # Load and prepare the data for the training, testing and validation.

    # -----
    # We are working with grayscale images, input size (572,572,1)

    # -----

```

```

# The script sorts the files accordingly.
# The prerequisites are that your masked images are in one folder and
# your originals in another and that they have matching names.
data_path = 'X:/yourdatapath/'
train_org_folder = 'Originals/' # Folder in data_path were the original images for
training are kept.
train_mask_folder = 'Masked/' # Folder in data_path were the masked images for training
are kept.

# Folders for validation images
valid_org_folder = 'Valid_Originals/' # Also used for testing the network
valid_mask_folder = 'Valid_Masked/' # Also used for testing the network
# -----
# Path for results
save_path = 'X:/yourdatapath save/'

# -----
log_name = 'training_data.log' # Name for file to save the training data
save_log = 'X:/yourdatapath_save/log/' + log_name

# Save the U-Net model (two models are saved,
# the best that is updated during training, and the final)
modelSave1 = 'X:/yourdatapath_saveModel/Unet.tf' # saving the best model
modelSave2 = 'X:/yourdatapath_saveModel/Unet_final.tf' # saving the final model

# If there is a separate folder for the validation images that
# shall be unseen by the network...
valid_path = 'X:/yourdatapath_validation/'

# -----
# Sorting the images
# -----
# The code sort the images. If there are a lot of images and they are presorted,
# this part can be skipped

# The complete path to the training/testing/validation files
train_org_path = os.path.join(data_path, train_org_folder)
train_mask_path = os.path.join(data_path, train_mask_folder)
valid_org_path = os.path.join(valid_path, valid_org_folder)
valid_mask_path = os.path.join(valid_path, valid_mask_folder)

train_org_images = os.listdir(train_org_path)
train_mask_images = os.listdir(train_mask_path)
valid_org_images = os.listdir(valid_org_path)
valid_mask_images = os.listdir(valid_mask_path)

train_org = train_org_images
train_mask = train_mask_images
test_org = valid_org_images
test_mask = valid_mask_images

valid_org = valid_org_images
valid_mask = valid_mask_images

# -----
# An option is to have all available images in one folder and sort them from there.
# Then this part of the code can be used.

# Split Data
# 80%, 15%, 5% (training, testing and validation)
#train_org, test_org, train_mask, test_mask = train_test_split(train_org_images,
train_mask_images, test_size=0.2, random_state=57) # 15% for "testing", 80% for training
#test_org, valid_org, test_mask, valid_mask = train_test_split(test_org, test_mask,
test_size=0.25, random_state=57) # Split the remaining data in testing and validation
# -----
# -----
print(train_org)
print(train_mask)
print(test_org)
print(test_mask)
print(valid_org)
print(valid_mask)
print('.....')
print('Number of training images: ', len(train_org))
print('Number of testing images: ', len(test_org))
print('Number of validation images: ', len(valid_org))

```

```

# -----
# Now we have structured the data and need to sort them in given folders
folders = ['train images', 'train masks', 'test images', 'test masks', 'valid images',
'valid_masks']
for folder in folders:
    existing = os.listdir(data_path)
    if folder not in existing:
        os.makedirs(data_path + folder)

image_folders = [(train_org, 'train_images'), (test_org, 'test_images'),
                  (valid_org, 'valid_images')]

mask_folders = [(train_mask, 'train_masks'), (test_mask, 'test_masks'),
                 (valid_mask, 'valid_masks')]

# Move images to right folder, originals and masks.
for folder in image_folders:
    images = folder[0]
    folderName = folder[1]
    for image in images:
        if folderName == 'valid_images':
            img = Image.open(valid_org_path + image)
        elif folderName == 'test_images':
            img = Image.open(valid_org_path + image)
        else:
            img = Image.open(train_org_path + image)
        img.save(data_path + folderName + '/' + image)

for folder in mask_folders:
    images = folder[0]
    folderName = folder[1]
    for image in images:
        if folderName == 'valid_masks':
            img = Image.open(valid_mask_path + image)
        elif folderName == 'test_masks':
            img = Image.open(valid_mask_path + image)
        else:
            img = Image.open(train_mask_path + image)
        img.save(data_path + folderName + '/' + image)

# -----
# SET PARAMETERS
# -----
# Image size:
#img_W = 512      # With padding
#img_H = 512      # With padding
img_W = 572      # Without padding
img_H = 572      # Without padding

batchSize = 20
bufferSize = 1000 # How many images do you have as input? Make sure this variable is
larger.
numberClasses = 3 # void, matrix, fiber

# -----
# FIX DATA SO THAT IT IS SUITED FOR TRAINING
# -----
# -----
# Creating the datasets from the original images
print('.....')
print('Creating the datasets ...')
train_image_ds = []
test_image_ds = []
valid_image_ds = []
loopNbr = 0
for folder in image_folders:
    images = folder[0]
    folderName = folder[1]
    for image in images:
        image_path = data_path+folderName+'/'+image
        img = cv2.imread(image_path, cv2.IMREAD_GRAYSCALE)
        # Shape of the image is here 512x512 (with padding)
        # or 572x572 (without padding), read as a grayscale image
        # We want it to be (x,x,1) before moving on.
        #img = cv2.resize(img, (img_H, img_W)) # If we need to resize the image
        img = img.reshape(img_H, img_W, 1)

```

```

        img = img.astype(np.float32)
        img = img/255.0 # Normalize the values

        if loopNbr == 0:
            train_image_ds.append(np.array(img))
        if loopNbr == 1:
            test_image_ds.append(np.array(img))
        if loopNbr == 2:
            valid_image_ds.append(np.array(img))
        loopNbr = loopNbr + 1

# Convert to numpy arrays
train_image_ds = np.array(train_image_ds)
test_image_ds = np.array(test_image_ds)
valid_image_ds = np.array(valid_image_ds)
print('.....')
print('Shape of numpy array with training, testing and validation images')
print(train_image_ds.shape, test_image_ds.shape, valid_image_ds.shape)

# Creating the datasets from the masked images
# NOTE: The masked images need to be in the shape (img_W,img_H,numberClasses)
# for the learning to work.
train_mask_ds = []
test_mask_ds = []
valid_mask_ds = []
weight_vector = []
loopNbr = 0
for folder in mask_folders:
    images = folder[0]
    folderName = folder[1]
    for image in images:
        image_path = data_path + folderName + '/' + image
        img = cv2.imread(image_path, cv2.IMREAD_GRAYSCALE)
        # PLOT THE IMAGES
        #plt.figure()
        #plt.imshow(img)
        #plt.show()

        # With current settings our mask images has pixel values
        # 0 - void, 1 - matrix, 2 - fiber
        # This is good so we don't change any pixel values
        #img = cv2.resize(img, (img_H, img_W)) # If we need to resize the image
        img = img.astype(np.int32) # Turn into np array
        weight_vector.append(img) # adds all masks to one vector

    # Shape of the image is now (img_w,img_H)
    # We want it to be (img_w, img_H,3) before moving on.
    # Creates the correct layers for the masks, one layer for each output class.
    # [1,0,0] - void, [0,1,0] - matrix, [0,0,1] - fiber
    img = tf.keras.utils.to_categorical(img, num_classes=numberClasses, dtype='int32')

    if loopNbr == 0:
        train_mask_ds.append(img)
    if loopNbr == 1:
        test_mask_ds.append(img)
    if loopNbr == 2:
        valid_mask_ds.append(img)
    loopNbr = loopNbr + 1

# Convert to numpy arrays
train_mask_ds = np.array(train_mask_ds)
test_mask_ds = np.array(test_mask_ds)
valid_mask_ds = np.array(valid_mask_ds)
weight_vector = np.array(weight_vector)
print('.....')
print('Shape of numpy array with training, testing and validation images')
print(train_mask_ds.shape, test_mask_ds.shape, valid_mask_ds.shape)

# -----
# ANALYSING THE WEIGHTS OF THE CLASSES
# Use sample_weights
# The shape of the sample weights shall be: ()
# The sample weight describes the weight for each training sample,
# used for weighting in the loss function during training.

```

```

# Checking for unbalanced data
print('.....')
print('Unique values in the weight vector: ', np.unique(weight_vector))
weight_classes = np.unique(weight_vector)
weight_classes.astype(np.int32)
# Flatten out the data to one dimensional
weight_vector_resaped = weight_vector.reshape(-1,1)
weight_vector_resaped = np.asarray(weight_vector_resaped)
# Encoding to shape - (x,)
labelencoder = LabelEncoder()
weight_vector_resaped = labelencoder.fit_transform(weight_vector_resaped)
class_weights = class_weight.compute_class_weight('balanced',
np.unique(weight_vector_resaped), weight_vector_resaped)
# Create a dictionary
class_weights_dicts = {weight_classes[0]: class_weights[0], weight_classes[1]:
class_weights[1], weight_classes[2]: class_weights[2]}
print('The class weights are:', class_weights_dicts)

# -----
print('.....')
print('The final training, testing and validation data in numpy arrays: ')
print('Training dataset: ', train_image_ds.shape, train_mask_ds.shape)
print('Testing dataset: ', test_image_ds.shape, test_mask_ds.shape)
print('Validation dataset: ', valid_image_ds.shape, valid_mask_ds.shape)

# -----
# CREATE TensorFlow DATASET
print('.....')
print('Creating the TensorFlow dataset (.from_tensor_slices) ...')
train_ds = tf.data.Dataset.from_tensor_slices((train_image_ds, train_mask_ds))
test_ds = tf.data.Dataset.from_tensor_slices((test_image_ds, test_mask_ds))
valid_ds = tf.data.Dataset.from_tensor_slices((valid_image_ds, valid_mask_ds))

print('TensorFlow Datasets are created! ...')

train_ds = train_ds.shuffle(buffer_size=bufferSize, reshuffle_each_iteration=True)
train_ds = train_ds.batch(batchSize)
train_ds = train_ds.repeat()
train_ds = train_ds.prefetch(5) # Speeding up...

test_ds = test_ds.shuffle(buffer_size=bufferSize, reshuffle_each_iteration=True)
test_ds = test_ds.batch(batchSize)
test_ds = test_ds.repeat()
test_ds = test_ds.prefetch(5) # Speeding up...

valid_ds = valid_ds.shuffle(buffer_size=bufferSize, reshuffle_each_iteration=True)
valid_ds = valid_ds.batch(batchSize)
valid_ds = valid_ds.repeat()
valid_ds = valid_ds.prefetch(5) # Speeding up...

print('.....')
print('Summary of the datasets created: ')
print('Training dataset: ', train_ds)
print('Testing dataset: ', test_ds)
print('Validation dataset: ', valid_ds)

# -----
# PARAMETERS FOR THE TRAINING
# -----
#inputShape = (512, 512, 1) # With padding
inputShape = (572, 572, 1) # Without padding
learnRate = 1e-4
EPOCHS = 200

# -----
# 1. Define the Model:
# -----
# The model is defined in the class CNN_UNet()
model = CNN_UNet(inputShape, 3, numberClasses, batchSize)
# -----

print('.....')
print('The model is defined with ')
print('Batch size = ', batchSize)
print('EPOCHS = ', EPOCHS)

```



```

# -----
# 2. Compile the Model:
# -----
print('.....')
print('Compiling model ...')
# Compile the model and set the loss function and optimizer.
# The loss should for multiclass be categorical_crossentropy or multicross_entropy.
model.compile(loss='categorical_crossentropy',
optimizer=tf.keras.optimizers.Adam(learnRate), metrics=['accuracy'])

train_steps = len(train_org)//batchSize
test_steps = len(test_org)//batchSize
print('.....')
print('Steps per EPOCH = ', train_steps)

print('.....')
print('Training the model ...')
print('.....')

# -----
# SETTING CALLBACKS
mc = ModelCheckpoint(modelSave1, verbose=1, save_best_only=True)
#mc = ModelCheckpoint('Unet.tf', monitor='val_accuracy', mode='max', verbose=1,
save_best_only=True)

# Adjusting the learning rate
rlp = ReduceLROnPlateau(monitor='val_loss', patience=4, factor=0.1, verbose=1, min_lr=1e-
6)

# Start with keeping it simple, add callbacks when you know everything is working
#es = EarlyStopping(monitor='val_loss', patience=10, verbose=1,
restore_best_weights=False)

# Saving the history data from the run
csv_logger = CSVLogger(save_log, separator=',', append=False)
#callbacks = [mc, csv_logger]
callbacks = [mc, csv_logger, rlp]
#callbacks = [mc, csv_logger, rlp, es]

# -----
# 3. Fit the model.
# -----
# Starting the training of the model
history = model.fit(train_ds, steps_per_epoch=train_steps, validation_data=test_ds,
validation_steps=test_steps,
epochs=EPOCHS, callbacks=callbacks)

# If your data is unequally weighted an option is to
# take the weights of the classes into consideration.
#history = model.fit(train_ds, steps_per_epoch=train_steps, validation_data=test_ds,
validation_steps=test_steps,
# epochs=EPOCHS, callbacks=callbacks, class_weight=class_weights_dicts)

# -----
# 4. Evaluate the model.
# -----
print('.....')
print('Listing all data in history ...')
print(history.history.keys())

print('.....')
print('Training accuracy ...')
_, train_acc = model.evaluate(train_ds, steps=train_steps, verbose=1)
_, test_acc = model.evaluate(test_ds, steps=test_steps, verbose=1)
print('Train: %.3f, Test: %.3f' % (train_acc, test_acc))

print('.....')
print(' Plotting ...')
# Plot training history
plt.figure()
plt.plot(history.history['loss'], 'bo', label='Training Loss')
plt.plot(history.history['val_loss'], 'b', label='Validation Loss')
plt.title('Training and Validation Loss')
plt.legend()
plt.savefig(save_path+'testplot_loss.png')
# -----

```

```

plt.figure()
plt.plot(history.history['accuracy'], 'bo', label='Training Accuracy')
plt.plot(history.history['val accuracy'], 'b', label='Validation Accuracy')
plt.title('Training and Validation Accuracy')
plt.legend()
plt.savefig(save_path + 'testplot_acc.png')
plt.show()

# Print summary of the NN model
print('.....')
print('MODEL SUMMARY')
print('.....')
print(model.summary())

print('.....')
print('Saving the model')
model.save(modelSave2, save_format='tf')

# -----
# 5. Make predictions.
# -----
# Testing/Validation
# LOAD THE MODEL
#model = tf.keras.models.load_model(modelSave1)
model = tf.keras.models.load_model(modelSave2)
print('.....')
print('Loaded the trained model for validation')

# -----
# VALIDATION OF TRAINING
# File location for validation images
validation_images = image_folders[2][0] # list with validation images
validation_mask = mask_folders[2][0] # list with validation masks
validation_folder_images = image_folders[2][1] # string with name of folder for validation
images
validation_folder_masks = mask_folders[2][1] # string with name of folder for validation
masks

validation_images_path = data_path + validation_folder_images + '/'
validation_masks_path = data_path + validation_folder_masks + '/'

print('.....')
print('Folder and files for validation images and masks:')
print('Images:', validation_images_path)
print(validation_images)
print('Masks:', validation_masks_path)
print(validation_mask)

# Go through validation images and run them through the network
print('.....')
print('Predicting the validation images ...')
for i in range(len(validation_images)):
    x = validation_images[i]
    y = validation_mask[i]

    name = x # Name for result file

    # Read images
    path = validation_images_path + x
    x = cv2.imread(path, cv2.IMREAD_GRAYSCALE)
    #x = cv2.resize(x, (img_W, img_H)) # Resize if necessary
    x = x/255.0 # Normalize data
    x = np.expand_dims(x, axis=-1) # Expand dimension to (img_W,img_H,1)
    x = x.astype(np.float32) # Turn into np.array float32

    # Read mask
    path = validation_masks_path + y
    y = cv2.imread(path, cv2.IMREAD_GRAYSCALE)
    #y = cv2.resize(y, (img_W, img_H)) # Resize if necessary
    # The masks are in values (0,1,2)

    # Expand dimension to (img_W, img_H, 1) (this time 1, just for plotting)
    y = np.expand_dims(y, axis=-1)

```

```

# Adjust values for plotting
y = y*(255/(numberClasses-1))
y = y.astype(np.float32)
# if no padding - Pad image to get correct size.
y = resize_with_crop_or_pad(y, img_W, img_H)
print('Shape y: ', y.shape)

# Prediction
print('Predicting:', name)
p = model.predict(np.expand_dims(x, axis=0))[0]
# (1,512,512,3) with padding, and without padding (1,388,388,3)

# Set the values such that the prediction can be plotted
p2 = np.amax(p, axis=-1) # This is to plot the certainty of chosen value
p = np.argmax(p, axis=-1)

# Plotting the certainty
p2 = p2 * (255/(numberClasses-1))
plt.figure()
plt.imshow(p2)
plt.show()
cv2.imwrite(save_path + 'prediction' + name, p2)

# Expanding dimensions to (img_W,img_H,1)
p = np.expand_dims(p, axis=-1)
p = p*(255/(numberClasses-1)) # Adjust values for plotting
p = p.astype(np.float32)
# Pad image to get correct size
p = resize_with_crop_or_pad(p, img_W, img_H)
print('Shape p: ', p.shape)
#p = np.concatenate([p, p, p], axis=2)

# FINAL IMAGE
# Put the images all together
x = x*255.0 # Go back to original values
x = x.astype(np.int32)
# Add a line between the images
line = np.ones((img_H, 10, 1))*255
final_image = np.concatenate([x, line, y, line, p], axis=1)

fig = plt.figure()
plt.imshow(final_image)
plt.show()
plt.close(fig)

# SAVE the results image
cv2.imwrite(save_path + name, final_image)

## =====
#
#
#
#
## =====

if __name__ == '__main__':
    main()

```
